# Supplementary material for: Raw and heat-treated quinoa protein protects against glucose metabolism disorders in high-fat diet (HFD)-induced mice by reshaping gut microbiota and fecal metabolic profiles
Source: Royal Society of Chemistry journal article supplement (doi:10.1039/d4fo02904f), 2024-01-01
Supplement: d4fo02904f1.pdf [file d4fo02904f1.pdf]

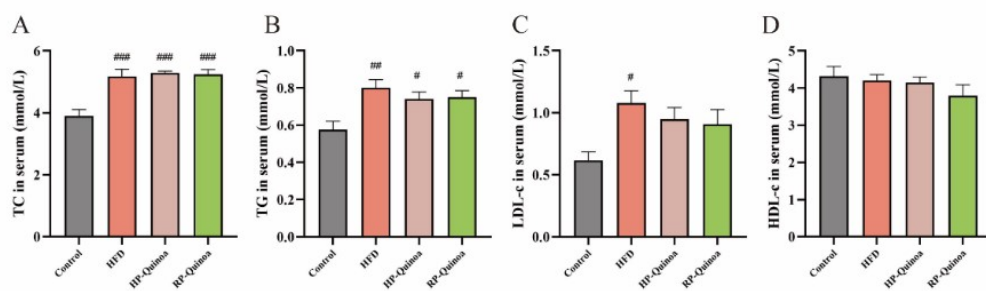

Figure S1. Effects of quinoa protein on the blood lipid levels. (A)TC; (B)TG; (C)LDL-c; (D)HDL-c. \* $p < 0.05$ , \*\* $p < 0.01$  and \*\*\* $p < 0.001$  compared with HFD group. # $p < 0.05$ , ## $p < 0.01$ , ### $p < 0.001$  compared with Control group.

TG, Triglyceride; TC, total cholesterol; LDL-c, low-density lipoprotein cholesterol; HDL-c, high-density lipoprotein cholesterol.

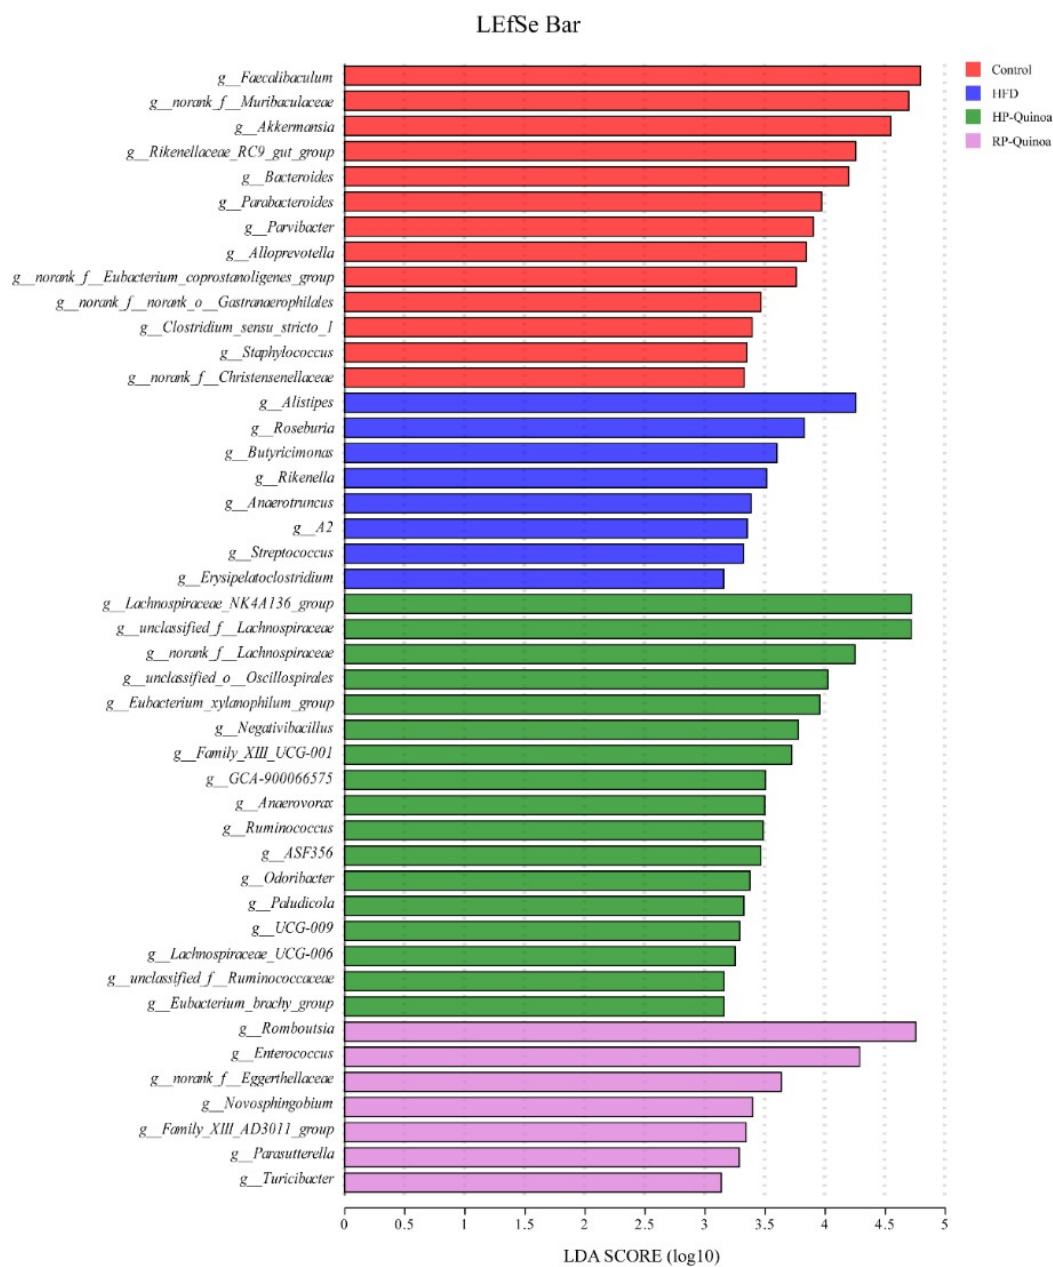

Figure S2. Linear discriminant analysis (LDA  $\geq$  3.0) of all groups.

A

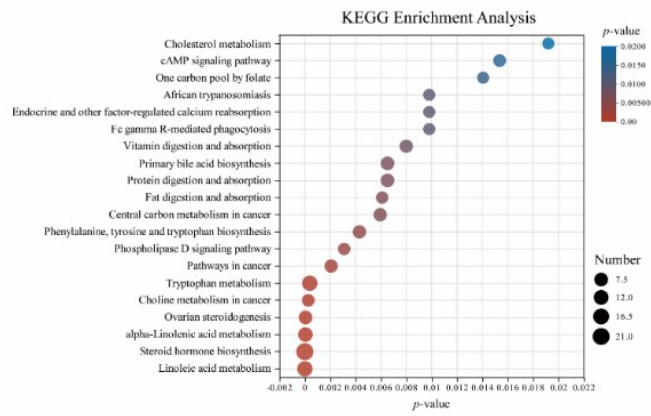

B

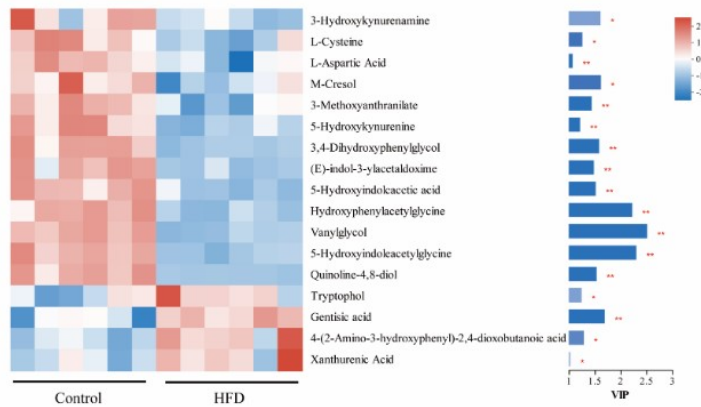

Figure S3. Effects of quinoa protein on fecal metabolomic profiles in mice. (A) KEGG enrichment analysis of RP-Quinoa group; (B) VIP analysis of HFD group and Control group fecal metabolomic profiles. \* $p < 0.05$ ; \*\* $p < 0.01$ ; \*\*\* $p < 0.001$ ,  $n=6$  mice/group.

KEGG, Kyoto Encyclopedia of Genes and Genomes; RP-Quinoa, raw quinoa protein; VIP, variable importance in projection.

Table S1 The basic composition of quinoa protein

| Ingredient %   | Starch | Crude protein | Crude fat | Crude fiber |
|----------------|--------|---------------|-----------|-------------|
| Quinoa protein | 1.18   | 85.2          | 5.25      | 0.09        |

**Table S2** Specific formulas of different feeds

| Ingredient<br>(g/kg)     | Control | HFD  | HP-Quinoa | RP-Quinoa |
|--------------------------|---------|------|-----------|-----------|
| RP-Quinoa or HP-Quinoa   | 0       | 0    | 118.7     | 118.7     |
| Casein                   | 200     | 200  | 100       | 100       |
| L-Cystine                | 3       | 3    | 3         | 3         |
| Corn Starch              | 506.2   | 0    | 0         | 0         |
| Maltodextrin 10          | 125     | 125  | 123.3     | 123.3     |
| Sucrose                  | 68.8    | 68.8 | 68.8      | 68.8      |
| Cellulose, BW200         | 50      | 50   | 55.08     | 55.08     |
| Soybean Oil              | 25      | 25   | 18.8      | 18.8      |
| Lard                     | 20      | 245  | 245       | 245       |
| Mineral Mix S10026       | 10      | 10   | 10        | 10        |
| DiCalcium Phosphate      | 13      | 13   | 13        | 13        |
| Calcium Carbonate        | 5.5     | 5.5  | 5.5       | 5.5       |
| Potassium Citrate, 1 H2O | 16.5    | 16.5 | 16.5      | 16.5      |
| Vitamin Mix, V10001      | 10      | 10   | 10        | 10        |
| Choline Bitartrate       | 2       | 2    | 2         | 2         |
| FD&C Blue Dye #1         | 0.01    | 0.05 | 0.05      | 0.05      |
| FD&C Yellow Dye #5       | 0.04    | 0    | 0         | 0         |

Calculated energy (kcal%)

|              |    |    |    |    |
|--------------|----|----|----|----|
| Protein      | 20 | 20 | 20 | 20 |
| Fat          | 10 | 60 | 60 | 60 |
| Carbohydrate | 70 | 20 | 20 | 20 |

---

Abbreviations: Control, normal chow diet; HFD, high-fat diet; HP-Quinoa, heat-treated quinoa protein replaced 50% of the casein in the original feed; RP-Quinoa, raw quinoa protein replaced 50% of the casein in the original feed
